# Supplementary material for: Dissecting the Molecular Regulation of Natural Variation in Growth and Senescence of Two Eutrema salsugineum Ecotypes
Source: Int J Mol Sci. 2022 May 30;23(11):6124. doi: 10.3390/ijms23116124 (PMC9181637; doi:10.3390/ijms23116124)
Supplement: Supplementary file 1 [file ijms-23-06124-s001.zip]

Archive with 4 entries (4 files):
- Supplementary method.pdf
- Supplementary Table S1.xls
- Supplementary Table S2.xls
- Supplementary Table S3.xls
