# Supplementary material for: Dissecting the Molecular Regulation of Natural Variation in Growth and Senescence of Two Eutrema salsugineum Ecotypes
Source: Int J Mol Sci. 2022 May 30;23(11):6124. doi: 10.3390/ijms23116124 (PMC9181637; doi:10.3390/ijms23116124)
Supplement: Supplementary file 1 [file ijms-23-06124-s001.zip › Supplementary Table S1.xls]

## Sheet: Sheet1
Table S1. Peptide identification of shoot proteins.
Spot number	Locus in Arabidopsis thaliana	Accession numbers of Eutrema	Protein name	Number of peptides	Peptide sequence	MH+	Charge	Xcoor	DelCn	Sp	RSp	Ions
Cellular metabolic process
XS4	At3g58610	XP_006402768	ketol-acid reductoisomerase	2	K.HLPDAFK.G	827.951	2	2.0276	0.2932	372	4	0.75
					K.HLPDAFK.G	827.951	2	1.8208	0.1788	236.3	9	0.666667
XS19	At5g27380	XP_006402768	glutathione synthetase	2	K.IQQELAKPGVLER.F	1481.72	2	2.6287	0.3482	881.4	1	0.666667
					R.LVSQLHQSLLR.S	1294.53	2	1.9366	0.3564	802.3	1	0.7
XS8	At4g33680	XP_024005372	LL-diaminopimelate aminotransferase	2	K.THVVTTPGSGFGPGGEGFVR.V	1960.14	2	3.2411	0.5455	445.2	1	0.526316
					K.THVVTTPGSGFGPGGEGFVR.V	1960.14	2	4.1269	0.6105	939.8	1	0.631579
SS4	At1g09780	XP_006417539	2,3-bisphosphoglycerate-independent phosphoglycerate mutase 1	7	K.LDDHPK.L	724.786	2	1.7557	0.1906	582.9	3	0.8
					K.NAVEAVK.T	730.833	1	1.312	0.1191	271.3	1	0.666667
					K.NAVEAVK.T	730.833	1	1.2761	0.1448	283	7	0.583333
					R.DAILSGK.F	703.808	1	1.973	0.3951	587.5	1	0.75
					K.ALEIGEK.A	759.871	1	1.3208	0.135	365	4	0.666667
					R.VHILTDGR.D	911.041	2	1.9431	0.3322	666.7	1	0.714286
					R.VHILTDGR.D	911.041	2	1.8511	0.4514	768.3	1	0.714286
SS5	At1g09780	XP_006417539	2,3-bisphosphoglycerate-independent phosphoglycerate mutase 1	36	K.NAVEAVK.T	730.833	1	1.2295	0.2012	347.3	1	0.666667
					K.LDDHPK.L	724.786	2	2.039	0.291	515.5	3	0.8
					K.LDDHPK.L	724.786	2	1.6236	0.2877	517.7	2	0.8
					K.NAVEAVK.T	730.833	2	1.8217	0.098	322.3	4	0.75
					K.SGKPALDK.E	815.938	2	2.2665	0.2228	486.3	1	0.785714
					K.NAVEAVK.T	730.833	2	2.3424	0.2279	430.4	1	0.833333
					K.SGKPALDK.E	815.938	2	2.2896	0.2539	393.2	1	0.785714
					R.ENGVDAQIASGGGR.M	1331.38	2	1.9815	0.3725	471	1	0.5
					R.ENGVDAQIASGGGR.M	1331.38	2	2.2894	0.4487	842.3	1	0.615385
					K.ALEYEDFDKFDR.V	1548.64	2	2.8077	0.5114	1112.2	2	0.681818
					K.ALEYEDFDKFDR.V	1548.64	2	2.0815	0.4832	798.6	1	0.636364
					R.SGYFNEK.L	844.892	1	2.1287	0.1572	588.5	1	0.75
					R.SGYFNEK.L	844.892	1	1.757	0.2392	472.9	1	0.75
					K.ALEIGEK.A	759.871	1	1.924	0.2294	546.4	1	0.75
					K.ALEIGEK.A	759.871	2	2.1666	0.0975	306.1	4	0.75
					R.VHILTDGR.D	911.041	2	2.308	0.4641	919.9	1	0.857143
					R.VHILTDGR.D	911.041	1	1.7068	0.309	249.9	5	0.571429
					R.VHILTDGR.D	911.041	1	1.7519	0.4012	400.3	1	0.714286
					R.MYVTLDR.Y	898.063	1	1.2864	0.2264	92.1	70	0.5
					R.YENDWEVVKR.G	1338.45	2	2.5759	0.4101	718.3	1	0.722222
					K.ALEIGEK.A	759.871	1	1.4658	0.1417	586.5	1	0.75
					R.GWDAQVLGEAPHK.F	1408.54	2	3.5086	0.46	1267.6	1	0.833333
					R.YAGMLQYDGELK.L	1388.57	2	2.9379	0.4218	1149.5	1	0.727273
					R.GWDAQVLGEAPHK.F	1408.54	2	3.2805	0.518	1273.9	1	0.75
					R.YAGMLQYDGELK.L	1388.57	2	3.6735	0.5155	1202.6	1	0.818182
					R.YLVSPPEIDR.T	1189.34	2	1.7234	0.1296	646.8	2	0.666667
					R.GWDAQVLGEAPHK.F	1408.54	3	2.6784	0.1884	444.4	1	0.458333
					K.ALEYEDFDKFDR.V	1548.64	2	2.4309	0.4868	789.5	2	0.636364
					K.ALEYEDFDKFDR.V	1548.64	2	2.9587	0.5108	1543.9	1	0.727273
					K.ALEYEDFDKFDR.V	1548.64	2	2.7192	0.4372	726.2	1	0.590909
					R.LDQLQLLIK.G	1084.33	2	3.3847	0.2106	1375.2	1	0.875
					R.VHILTDGR.D	911.041	2	1.5856	0.3275	830.1	1	0.714286
					R.GWDAQVLGEAPHK.F	1408.54	2	2.3338	0.2804	1149.2	1	0.666667
					R.GWDAQVLGEAPHK.F	1408.54	2	2.1929	0.3622	1059.2	1	0.666667
					R.LDQLQLLIK.G	1084.33	2	3.1579	0.1301	1344.3	1	0.875
					K.FGHVTFFWNGNR.S	1482.63	2	2.9115	0.4573	1092.8	1	0.727273
SS27	At3g22890	XP_006406118	ATP sulfurylase 1	7	K.NSAAVQK.Y	1721.9	2	2.8174	0.322	805.4	1	0.576923
					K.NSAAVQK.Y	1721.9	2	2.6574	0.5166	806.2	1	0.576923
					K.NSAAVQK.Y	1721.9	2	3.1076	0.5407	821.7	1	0.576923
					K.TFDESK.E	1721.9	2	2.0371	0.3924	337.7	1	0.423077
					K.TFDESK.E	1721.9	2	2.7095	0.3696	670.3	1	0.538462
					K.VVETYEATSAEVK.A	1721.9	2	2.5191	0.4809	594.7	1	0.538462
					K.KTELQPK.V	1721.9	2	2.0201	0.443	543.7	1	0.461538
XS28	At3g22890	XP_006406118	ATP sulfurylase 1	6	R.VAAYDK.T	666.746	1	1.6622	0.2111	499.4	1	0.7
					R.DLYDADHGKK.V	1162.23	2	1.3323	0.2502	273.1	1	0.5
					R.DLYDADHGKK.V	1162.23	2	1.7898	0.3045	386.3	1	0.611111
					R.LSPAELR.K	785.912	2	1.4782	0.2895	262.7	1	0.75
					R.ESEFLQTLHFNSLR.L	1721.9	2	3.8911	0.4698	1204.3	1	0.692308
					R.ESEFLQTLHFNSLR.L	1721.9	2	3.1837	0.5014	911.7	1	0.615385
SS21	At1g12050	XP_006417270	fumarylacetoacetase	4	R.LPIAYHGR.A	927.086	2	2.4354	0.3165	883.2	1	0.857143
					R.LPIAYHGR.A	927.086	2	1.921	0.3099	614	1	0.785714
					R.DIQAWEYVPLGPFLGK.S	1834.11	2	2.5097	0.4565	541	1	0.5
					R.ASSIVISGTDIIRPR.G	1585.83	2	1.8442	0.2596	309.8	1	0.392857
XS33	At2g40010	XP_006411245	60S acidic ribosomal protein P0-1	9	K.EVSEEVAK.Y	890.959	1	1.4737	0.1371	362.8	2	0.714286
					K.EVSEEVAK.Y	890.959	1	1.3843	0.1885	465	1	0.714286
					R.GDSVVLMGK.N	906.083	1	1.3253	0.3944	270	2	0.5625
					R.GDSVVLMGK.N	906.083	1	1.4786	0.4071	401.1	1	0.5625
					K.VGSSEAALLAK.L	1046.2	2	2.8586	0.3884	967.9	1	0.75
					K.VGSSEAALLAK.L	1046.2	2	2.8325	0.4136	892.4	1	0.85
					K.GTVEIITPVELIK.K	1412.7	1	1.4938	0.0951	313.9	1	0.416667
					K.GTVEIITPVELIK.K	1412.7	1	1.3766	0.2401	408.3	1	0.458333
					K.VGSSEAALLAK.L	1046.2	2	1.7771	0.3026	549.8	1	0.6
Response to stress
SS6	At4g20260	XP_006413890	plasma membrane-associated cation-binding protein 1	8	K.NSAAVQK.Y	717.795	2	1.4581	0.1974	229.8	2	0.666667
					K.NSAAVQK.Y	717.795	1	1.9461	0.1079	340.7	1	0.75
					K.NSAAVQK.Y	717.795	2	1.6871	0.1137	422.2	1	0.833333
					K.TFDESK.E	726.755	1	1.6395	0.2747	616.5	2	0.8
					K.TFDESK.E	726.755	1	1.4397	0.2189	529.8	2	0.8
					K.VVETYEATSAEVK.A	1426.55	2	2.3027	0.4805	840.7	1	0.583333
					K.VVETYEATSAEVK.A	1426.55	2	4.8239	0.5165	1834.1	1	0.833333
					K.KTELQPK.V	843.992	2	1.833	0.2453	346.5	3	0.833333
SS7	At4g20260	XP_006413890	plasma membrane-associated cation-binding protein 1	5	K.NSAAVQK.Y	717.795	2	1.5929	0.2306	193.6	1	0.666667
					K.NSAAVQK.Y	717.795	1	1.7443	0.1521	339.2	1	0.666667
					K.NSAAVQK.Y	717.795	1	1.5981	0.1493	395.1	1	0.666667
					K.TFDESK.E	726.755	1	1.6909	0.3133	648	2	0.8
					K.VVETYEATSAEVK.A	1426.55	2	3.9818	0.6249	1533.3	1	0.791667
SS8	At4g20260	XP_006413890	plasma membrane-associated cation-binding protein 1	9	K.TFDESK.E	726.755	1	1.4363	0.3207	556.8	2	0.8
					K.TFDESK.E	726.755	1	1.5072	0.2635	510.4	1	0.8
					K.KTELQPK.V	843.992	2	2.2988	0.2312	560.3	2	1
					K.KTELQPK.V	843.992	1	1.6945	0.102	256.5	43	0.666667
					K.TFDESK.E	726.755	1	1.5528	0.2175	578	2	0.8
					K.TFDESK.E	726.755	1	1.6897	0.3029	570	3	0.8
					K.VVETYEATSAEVK.A	1426.55	2	1.7161	0.192	743.4	1	0.541667
					K.VVETYEATSAEVK.A	1426.55	2	3.3987	0.5427	1737.2	1	0.75
					K.VVETYEATSAEVK.A	1426.55	2	2.7641	0.5977	1102.3	1	0.708333
SS10	At1g75040	XP_006390358	pathogenesis-related protein 5	20	K.DFYDVSLVDGYNVK.L	1634.77	2	1.2773	0.1254	405.8	1	0.461538
					K.DFYDVSLVDGYNVK.L	1634.77	2	2.1772	0.5413	1431.1	1	0.692308
					K.DFYDVSLVDGYNVK.L	1634.77	2	2.0067	0.5419	1543.2	1	0.730769
					K.DFYDVSLVDGYNVK.L	1634.77	2	1.7429	0.2933	677.8	1	0.538462
					K.DFYDVSLVDGYNVK.L	1634.77	2	2.6027	0.4975	937.2	1	0.615385
					K.DFYDVSLVDGYNVK.L	1634.77	2	3.4932	0.657	2024.7	1	0.846154
					K.DFYDVSLVDGYNVK.L	1634.77	2	3.6003	0.575	1986.3	1	0.807692
					K.DFYDVSLVDGYNVK.L	1634.77	2	1.8682	0.4523	968	1	0.615385
					K.DFYDVSLVDGYNVK.L	1634.77	2	2.8835	0.5352	1242.4	1	0.692308
					K.DFYDVSLVDGYNVK.L	1634.77	2	1.8493	0.3761	959.9	1	0.615385
					K.DFYDVSLVDGYNVK.L	1634.77	2	3.1557	0.5025	1585.2	1	0.692308
					K.DFYDVSLVDGYNVK.L	1634.77	2	2.9283	0.539	1212.3	1	0.730769
					K.DFYDVSLVDGYNVK.L	1634.77	2	2.2494	0.4415	1323.7	1	0.692308
					K.DFYDVSLVDGYNVK.L	1634.77	2	2.074	0.3204	939.6	1	0.615385
					K.DFYDVSLVDGYNVK.L	1634.77	2	4.6224	0.6735	1737.4	1	0.807692
					K.DFYDVSLVDGYNVK.L	1634.77	2	4.0847	0.5966	1584.4	1	0.769231
					K.DFYDVSLVDGYNVK.L	1634.77	2	2.1646	0.4139	499.3	1	0.5
					K.DFYDVSLVDGYNVK.L	1634.77	2	3.5653	0.6018	1497.7	1	0.730769
					K.DFYDVSLVDGYNVK.L	1634.77	2	2.8896	0.5928	1941.8	1	0.730769
					K.DFYDVSLVDGYNVK.L	1634.77	2	3.5208	0.5706	1468.9	1	0.769231
SS14	At2g43570	XP_006397529	endochitinase CHI	4	K.VAQDQVLAFK.T	1119.3	2	3.2078	0.5299	1734.1	1	0.888889
					K.VAQDQVLAFK.T	1119.3	2	1.9412	0.3497	913.3	1	0.722222
					K.VAQDQVLAFK.T	1119.3	2	2.6057	0.4066	1306.2	1	0.833333
					K.VAQDQVLAFK.T	1119.3	2	2.6613	0.4383	1162.6	1	0.777778
SS29	At3g57270	XP_006409034	probable glucan endo-1,3-beta-glucosidase BG1	2	R.LYSPDHDVLAALR.G	1470.66	2	3.1284	0.5436	1016.1	1	0.75
					R.LYSPDHDVLAALR.G	1470.66	2	3.1133	0.4961	1327.2	1	0.791667
XS15	At2g30860	XP_024004280	glutathione S-transferase F9	3	K.VYGPHFASPK.R	1103.26	2	2.0135	0.3697	594.3	1	0.722222
					K.VYGPHFASPK.R	1103.26	2	1.5675	0.3982	482	1	0.666667
					K.VYGPHFASPK.R	1103.26	2	1.5816	0.32	360.6	1	0.666667
Response to abiotic stimulus
XS12	At5g20720	XP_024011493	20 kDa chaperonin	16	K.YAGTEVEFNDVK.H	1372.46	2	4.1116	0.5348	1840.8	1	0.909091
					K.DGSNYIALR.A	1009.1	2	2.9177	0.2626	1197.2	1	0.875
					K.YAGTEVEFNDVK.H	1372.46	2	3.3969	0.4736	1594	1	0.818182
					K.DGSNYIALR.A	1009.1	2	2.6986	0.4005	1042.2	1	0.875
					K.YAGTEVEFNDVK.H	1372.46	2	3.6219	0.5371	1865.4	1	0.863636
					K.DGSNYIALR.A	1009.1	2	2.4486	0.2945	1149.9	1	0.875
					K.TAGGLLLTETTK.E	1205.38	2	3.9877	0.4763	1553.6	1	0.909091
					K.YAGTEVEFNDVK.H	1372.46	2	2.3426	0.5458	984.9	1	0.636364
					K.YAGTEVEFNDVK.H	1372.46	2	2.189	0.3333	1201.2	1	0.681818
					K.YAGTEVEFNDVK.H	1372.46	2	2.793	0.5085	1144.8	1	0.772727
					K.EKPSIGTVIAVGPGSLDEEGK.I	2084.31	3	2.0089	0.3208	757.3	1	0.325
					K.DGSNYIALR.A	1009.1	2	2.4995	0.344	1107.8	1	0.875
					K.YAGTEVEFNDVK.H	1372.46	2	3.1684	0.4676	1561.7	1	0.818182
					K.DGSNYIALR.A	1009.1	2	2.4776	0.2474	833.3	2	0.8125
					K.TAGGLLLTETTK.E	1205.38	2	2.8186	0.3214	771.6	1	0.590909
					K.TAGGLLLTETTK.E	1205.38	2	2.5431	0.4515	479	1	0.545455
SS11	At3g11630	XP_006407428	2-Cys peroxiredoxin BAS1	46	K.AQADDLPLVGNK.A	1241.38	2	2.2343	0.4587	508.7	1	0.590909
					K.EGVIQHSTINNLGIGR.S	1708.9	3	2.3869	0.1748	370.4	2	0.35
					K.SFGVLIHDQGIALR.G	1526.77	2	3.4608	0.471	1220.7	1	0.730769
					K.SGGLGDLNYPLISDVTK.S	1749.94	2	2.1219	0.2365	569.9	1	0.5
					K.SGGLGDLNYPLISDVTK.S	1749.94	2	3.2004	0.2387	780	1	0.5
					K.SGGLGDLNYPLISDVTK.S	1749.94	2	2.7694	0.2582	667.6	1	0.5
					K.SFGVLIHDQGIALR.G	1526.77	2	3.5058	0.5526	1034.6	1	0.730769
					K.SFGVLIHDQGIALR.G	1526.77	3	1.7018	0.3276	304.9	1	0.365385
					K.SFGVLIHDQGIALR.G	1526.77	2	3.4641	0.5555	657.6	1	0.653846
					K.SFGVLIHDQGIALR.G	1526.77	2	4.2195	0.5543	1172.7	1	0.730769
					K.SFGVLIHDQGIALR.G	1526.77	2	3.589	0.5469	1836	1	0.769231
					K.SFGVLIHDQGIALR.G	1526.77	3	2.442	0.4378	517.9	1	0.519231
					K.SFGVLIHDQGIALR.G	1526.77	3	2.3106	0.466	488.2	1	0.461538
					K.SFGVLIHDQGIALR.G	1526.77	2	4.1204	0.5947	1281.5	1	0.769231
					K.SFGVLIHDQGIALR.G	1526.77	2	3.3211	0.5233	1178.9	1	0.730769
					K.SFGVLIHDQGIALR.G	1526.77	2	3.0727	0.5362	1403.7	1	0.769231
					K.SFGVLIHDQGIALR.G	1526.77	3	2.3295	0.4228	442.7	1	0.423077
					K.SFGVLIHDQGIALR.G	1526.77	2	4.0095	0.591	1040.3	1	0.730769
					K.SFGVLIHDQGIALR.G	1526.77	2	3.8709	0.5639	1158.6	1	0.730769
					K.SFGVLIHDQGIALR.G	1526.77	2	4.1016	0.611	1453.5	1	0.807692
					K.SFGVLIHDQGIALR.G	1526.77	3	2.2439	0.4957	380.4	1	0.384615
					K.SFGVLIHDQGIALR.G	1526.77	2	3.3598	0.3667	885.4	1	0.692308
					K.SFGVLIHDQGIALR.G	1526.77	2	3.6318	0.5982	1206.7	1	0.769231
					K.LSDYIGK.K	795.904	1	1.3918	0.1549	409	1	0.666667
					K.AQADDLPLVGNK.A	1241.38	2	3.0805	0.4372	960.1	1	0.681818
					K.AQADDLPLVGNK.A	1241.38	2	2.8047	0.419	687	1	0.681818
					K.EGVIQHSTINNLGIGR.S	1708.9	2	1.5571	0.2796	286.3	1	0.4
					R.GLFIIDK.E	805.985	1	1.6084	0.198	490.2	13	0.666667
					R.GLFIIDK.E	805.985	1	1.7075	0.1062	394.5	14	0.666667
					K.EGVIQHSTINNLGIGR.S	1708.9	2	2.6464	0.393	236.2	3	0.4
					K.SGGLGDLNYPLISDVTK.S	1749.94	2	4.0977	0.2397	997.6	1	0.59375
					R.GLFIIDK.E	805.985	2	2.0686	0.2413	425.3	2	0.833333
					K.EGVIQHSTINNLGIGR.S	1708.9	3	2.123	0.198	491.3	5	0.316667
					R.KSGGLGDLNYPLISDVTK.S	1878.12	2	2.9922	0.2245	1120.6	1	0.529412
					K.LSDYIGK.K	795.904	1	1.2205	0.2086	324.9	5	0.583333
					K.SFGVLIHDQGIALR.G	1526.77	2	3.6737	0.5388	1083.1	1	0.692308
					K.SFGVLIHDQGIALR.G	1526.77	3	1.4846	0.2031	221.8	1	0.307692
					R.GLFIIDK.E	805.985	1	1.8034	0.1459	409.2	16	0.666667
					K.SFGVLIHDQGIALR.G	1526.77	2	3.9327	0.6013	1849.3	1	0.846154
					R.GLFIIDK.E	805.985	1	2.0472	0.2218	518	8	0.75
					K.APDFEAEAVFDQEFIK.V	1857.01	2	3.739	0.5735	1485.4	1	0.633333
					K.SGGLGDLNYPLISDVTK.S	1749.94	2	4.2032	0.2524	887.9	1	0.59375
					K.EGVIQHSTINNLGIGR.S	1708.9	2	3.148	0.468	446.1	1	0.5
					K.EGVIQHSTINNLGIGR.S	1708.9	2	2.8588	0.4845	482.3	1	0.533333
					K.AQADDLPLVGNK.A	1241.38	2	1.6482	0.3854	457.1	1	0.545455
					K.AQADDLPLVGNK.A	1241.38	2	1.8626	0.494	685.4	1	0.590909
SS12	At3g11630	XP_006407428	2-Cys peroxiredoxin BAS1	3	K.SFGVLIHDQGIALR.G	1526.77	2	3.7987	0.5347	909.2	1	0.730769
					K.SGGLGDLNYPLISDVTK.S	1749.94	2	2.1314	0.3472	225.9	4	0.34375
					K.SGGLGDLNYPLISDVTK.S	1749.94	2	1.8097	0.4016	302.1	1	0.375
XS11	At3g11630	XP_006407428	2-Cys peroxiredoxin BAS1	9	K.SGGLGDLNYPLISDVTK.S	1749.94	2	2.3196	0.1446	395.3	1	0.46875
					K.EGVIQHSTINNLGIGR.S	1708.9	2	3.0761	0.4585	484.5	1	0.5
					R.GLFIIDK.E	805.985	1	1.7006	0.1039	461.8	14	0.666667
					R.GLFIIDK.E	805.985	1	1.7951	0.2208	511.2	3	0.75
					K.EGVIQHSTINNLGIGR.S	1708.9	2	2.4515	0.4666	681.4	1	0.533333
					K.SGGLGDLNYPLISDVTK.S	1749.94	2	2.6844	0.3671	711.4	1	0.5
					K.SGGLGDLNYPLISDVTK.S	1749.94	2	2.7997	0.209	605	1	0.4375
					K.SGGLGDLNYPLISDVTK.S	1749.94	2	2.8731	0.3143	635.1	1	0.5
					K.LSDYIGK.K	795.904	1	1.3519	0.1149	212.3	6	0.5
Aging
XS6	At1g05010	XP_006418070	1-aminocyclopropane-1-carboxylate oxidase 4	4	R.AHTDAGGIILLFQDDK.V	1714.9	2	2.9642	0.5739	1317.9	1	0.666667
					R.AHTDAGGIILLFQDDK.V	1714.9	2	3.1605	0.4482	1848.6	1	0.7
					R.AHTDAGGIILLFQDDK.V	1714.9	2	3.5231	0.5716	2178.5	1	0.7
					R.AHTDAGGIILLFQDDK.V	1714.9	2	1.5681	0.205	140.4	2	0.366667
Unknown
SS26	At3g01500	XP_006408514	beta carbonic anhydrase 1	7	R.EAVNVSLANLLTYPFVR.E	1907.2	2	1.8971	0.3052	534.1	1	0.4375
					R.EAVNVSLANLLTYPFVR.E	1907.2	2	1.5459	0.2076	553.8	1	0.46875
					R.EAVNVSLANLLTYPFVR.E	1907.2	2	2.0861	0.4556	1069.2	1	0.5625
					R.EAVNVSLANLLTYPFVR.E	1907.2	2	3.4729	0.5552	1246.9	1	0.59375
					K.GGYYDFVK.G	949.042	1	1.4203	0.2182	348	2	0.571429
					K.GGYYDFVK.G	949.042	1	1.5036	0.1944	352.2	3	0.571429
					K.GGYYDFVK.G	949.042	1	1.7185	0.149	351.5	3	0.571429
XS27	At3g01500	XP_006408514	beta carbonic anhydrase 1	2	K.GGYYDFVK.G	949.042	1	1.7821	0.1106	502.3	1	0.642857
					R.EAVNVSLANLLTYPFVR.E	1907.2	2	1.5209	0.201	544.4	1	0.40625
SS30	At1g55480	XP_006392635	protein MET1	3	K.QFDESFINESAINAIK.S	1826.98	2	1.8616	0.2939	498.8	1	0.433333
					R.EGLQFSK.N	808.903	1	1.3788	0.1638	165.6	1	0.75
					K.QFDESFINESAINAIK.S	1826.98	2	2.711	0.482	887	1	0.566667
XS32	At1g55480	XP_006392635	protein MET1	23	K.SGYEDFKR.I	1002.06	2	2.5037	0.4975	799.3	1	0.857143
					K.SGYEDFK.R	845.877	1	1.2972	0.1198	362.8	1	0.583333
					K.NGKYEEALER.F	1209.29	2	1.7148	0.2042	939.2	1	0.777778
					R.EGLQFSK.N	808.903	1	1.7059	0.2293	203.7	1	0.75
					R.EGLQFSK.N	808.903	2	1.5568	0.1529	349	1	0.75
					R.FESVLGSK.P	866.982	1	1.5293	0.1622	240.6	18	0.571429
					K.SGYEDFKR.I	1002.06	2	1.7102	0.2105	544.9	1	0.714286
					K.SLFGFNK.K	812.936	1	1.6082	0.1567	266.2	10	0.583333
					R.DGGTYIDAILPGGSADK.T	1650.77	2	2.3886	0.463	474.9	1	0.5
					K.SGYEDFKR.I	1002.06	2	1.453	0.2786	481.7	1	0.642857
					K.QFDESFINESAINAIK.S	1826.98	2	3.0212	0.5821	591.3	1	0.5
					K.QFDESFINESAINAIK.S	1826.98	2	5.3407	0.6303	1376.3	1	0.633333
					R.IGPLLMQMEK.R	1160.48	2	2.5784	0.3301	691.3	1	0.777778
					R.IGPLLMQMEK.R	1160.48	2	3.2936	0.3325	872.7	1	0.833333
					R.DGGTYIDAILPGGSADK.T	1650.77	2	2.0131	0.3759	780.5	1	0.5625
					R.DGGTYIDAILPGGSADK.T	1650.77	2	2.8036	0.542	539.7	1	0.46875
					K.SLFGFNK.K	812.936	1	1.3999	0.269	307	3	0.666667
					K.SLFGFNK.K	812.936	1	1.5926	0.384	276.2	3	0.583333
					K.QFDESFINESAINAIK.S	1826.98	2	3.4648	0.6352	1182.8	1	0.666667
					K.QFDESFINESAINAIK.S	1826.98	2	1.7839	0.4262	524.9	1	0.466667
					K.QFDESFINESAINAIK.S	1826.98	2	2.1401	0.3423	620.7	1	0.5
					K.LNQVQAGLSALEEALK.S	1684.92	2	2.7216	0.5397	1029.3	1	0.633333
					K.LNQVQAGLSALEEALK.S	1684.92	2	2.7811	0.5827	1322.8	1	0.633333
