# Supplementary material for: Dissecting the Molecular Regulation of Natural Variation in Growth and Senescence of Two Eutrema salsugineum Ecotypes
Source: Int J Mol Sci. 2022 May 30;23(11):6124. doi: 10.3390/ijms23116124 (PMC9181637; doi:10.3390/ijms23116124)
Supplement: Supplementary file 1 [file ijms-23-06124-s001.zip › Supplementary Table S2.xls]

## Sheet: Sheet1
Table S2. Peptide identification of root proteins.
Spot number	Locus in Arabidopsis thaliana	Accession numbers of Eutrema	Protein name	Number of peptides	Peptide sequence	MH+	Charge	Xcoor	DelCn	Sp	RSp	Ions
Small molecule metabolic process
SR5	At1g09780	XP_006417539	2,3-bisphosphoglycerate-independent phosphoglycerate mutase 1	7	K.NAVEAVK.T	730.833	1	1.3617	0.1336	202.4	4	0.583333
					R.DAILSGK.F	703.808	1	1.7755	0.3882	430.7	1	0.666667
					K.ALEIGEK.A	759.871	1	1.526	0.2082	372.7	3	0.666667
					R.VHILTDGR.D	911.041	2	1.9973	0.4525	825.5	1	0.785714
					R.GWDAQVLGEAPHK.F	1408.54	2	2.5018	0.3943	1093.6	1	0.708333
					R.LDQLQLLIK.G	1084.33	2	2.6507	0.1814	1109	1	0.8125
SR6	At1g09780	XP_006417539	2,3-bisphosphoglycerate-independent phosphoglycerate mutase 1	42	R.DKSGKPALDK.E	1059.2	2	1.571	0.1925	373	3	0.611111
					R.DKSGKPALDK.E	1059.2	2	1.571	0.1925	373	3	0.611111
					R.DKSGKPALDK.E	1059.2	2	1.7516	0.2286	542.3	2	0.722222
					R.DKSGKPALDK.E	1059.2	2	1.7516	0.2286	542.3	2	0.722222
					K.NAVEAVK.T	730.833	1	1.65	0.0998	368.4	1	0.75
					K.SGKPALDKEGK.L	1130.28	3	2.7853	0.2078	1206.3	2	0.5
					K.SGKPALDKEGK.L	1130.28	3	2.7853	0.2078	1206.3	2	0.5
					K.SGKPALDKEGK.L	1130.28	2	1.8324	0.1501	380.7	3	0.6
					K.SGKPALDKEGK.L	1130.28	2	1.8324	0.1501	380.7	3	0.6
					K.SGKPALDKEGK.L	1130.28	3	2.8157	0.3172	1103.2	1	0.5
					K.SGKPALDKEGK.L	1130.28	3	2.8157	0.3172	1103.2	1	0.5
					K.SGKPALDKEGK.L	1130.28	2	2.8078	0.4314	509.6	1	0.75
					K.SGKPALDKEGK.L	1130.28	2	2.8078	0.4314	509.6	1	0.75
					K.NAVEAVK.T	730.833	2	1.7688	0.1815	441.8	3	0.833333
					R.DAILSGK.F	703.808	1	1.6752	0.3964	529.4	1	0.75
					K.SGKPALDK.E	815.938	2	2.0824	0.2227	643.3	1	0.928571
					K.SGKPALDK.E	815.938	2	2.051	0.2938	453.3	1	0.857143
					R.DAILSGK.F	703.808	1	1.8605	0.353	521.4	1	0.75
					R.ENGVDAQIASGGGR.M	1331.38	2	2.5683	0.5144	786.6	1	0.538462
					K.ALEIGEK.A	759.871	1	1.4371	0.1471	655.8	2	0.75
					K.ALEIGEK.A	759.871	1	1.9376	0.1702	495.5	1	0.75
					K.ALEIGEK.A	759.871	2	1.8715	0.1099	461.1	1	0.916667
					R.YENDWEVVK.R	1182.26	2	1.7652	0.2349	621	1	0.8125
					K.ALEIGEK.A	759.871	1	1.5961	0.2038	464	1	0.75
					R.VHILTDGR.D	911.041	2	2.1666	0.3656	967.1	1	0.857143
					R.ENGVDAQIASGGGR.M	1331.38	2	1.6921	0.4435	421.9	1	0.461538
					R.VHILTDGR.D	911.041	2	2.3567	0.4047	760.8	1	0.714286
					R.VHILTDGR.D	911.041	1	1.4076	0.3175	393.4	1	0.642857
					R.VHILTDGR.D	911.041	1	1.4218	0.2234	121.1	94	0.357143
					R.GWDAQVLGEAPHK.F	1408.54	2	4.1396	0.4454	1576.2	1	0.75
					R.GWDAQVLGEAPHK.F	1408.54	2	4.1396	0.4454	1576.2	1	0.75
					R.YENDWEVVKR.G	1338.45	2	2.7647	0.5	851.3	1	0.722222
					R.YENDWEVVKR.G	1338.45	2	2.8276	0.3647	696.7	1	0.722222
					R.YLVSPPEIDR.T	1189.34	2	1.7491	0.1908	352.8	1	0.5
					R.GWDAQVLGEAPHK.F	1408.54	2	4.5236	0.4997	1505.9	1	0.833333
					R.GWDAQVLGEAPHK.F	1408.54	2	4.0122	0.4858	1299.3	1	0.75
					R.LDQLQLLIK.G	1084.33	2	3.1643	0.1788	1565.3	1	0.875
					R.LDQLQLLIK.G	1084.33	2	2.367	0.146	847.2	1	0.75
					R.LDQLQLLIK.G	1084.33	1	1.4229	0.0959	775.8	1	0.6875
					R.LDQLQLLIK.G	1084.33	2	2.2238	0.1066	1166.3	1	0.8125
					R.VHILTDGR.D	911.041	2	1.4462	0.1061	294.5	1	0.5
					R.LDQLQLLIK.G	1084.33	2	2.2967	0.2376	1476.9	1	0.875
SR7	At1g09780	XP_006417539	2,3-bisphosphoglycerate-independent phosphoglycerate mutase 1	7	K.FDQVR.V	664.734	1	1.2069	0.1471	215.5	2	0.75
					K.SGKPALDK.E	815.938	2	1.7819	0.2383	457	1	0.785714
					R.DAILSGK.F	703.808	1	1.7364	0.3661	517.3	1	0.75
					R.DAILSGK.F	703.808	1	1.7901	0.175	671.1	1	0.75
					R.VHILTDGR.D	911.041	2	2.3195	0.4627	846.1	1	0.785714
					R.GWDAQVLGEAPHK.F	1408.54	2	2.3355	0.3708	1566.4	1	0.75
					R.LDQLQLLIK.G	1084.33	2	3.0557	0.2389	1359.4	1	0.875
XR2	At1g09780	XP_006417539	2,3-bisphosphoglycerate-independent phosphoglycerate mutase 1	12	R.DAILSGK.F	703.808	1	1.6087	0.2577	341.1	4	0.583333
					R.DAILSGK.F	703.808	1	1.644	0.293	563.8	1	0.75
					K.NAVEAVK.T	730.833	1	1.4787	0.1369	354.1	1	0.75
					K.NAVEAVK.T	730.833	1	1.4647	0.1316	285.4	3	0.666667
					K.GIYVVTADHGNAEDMVK.R	1820.02	2	3.0916	0.4249	994.7	1	0.59375
					R.SGYFNEK.L	844.892	1	1.8483	0.2324	557.8	1	0.75
					R.YAGMLQYDGELK.L	1388.57	2	2.4905	0.3731	1000.7	1	0.772727
					R.MYVTLDR.Y	898.063	1	1.3218	0.2602	246	1	0.666667
					R.GWDAQVLGEAPHK.F	1408.54	2	3.5304	0.456	1289.5	1	0.75
					K.GIYVVTADHGNAEDMVK.R	1820.02	2	3.3571	0.2957	1027	1	0.625
					K.GIYVVTADHGNAEDMVK.R	1820.02	2	3.2938	0.4242	1047.2	1	0.59375
					R.GWDAQVLGEAPHK.F	1408.54	2	2.5824	0.3818	681.3	1	0.583333
XR3	At1g09780	XP_006417539	2,3-bisphosphoglycerate-independent phosphoglycerate mutase 1	14	R.DAILSGK.F	703.808	1	1.4849	0.2901	349.4	1	0.666667
					R.DAILSGK.F	703.808	1	1.5785	0.3452	505.8	1	0.666667
					R.ENGVDAQIASGGGR.M	1331.38	2	2.1736	0.4039	526.3	1	0.461538
					R.GWDAQVLGEAPHK.F	1408.54	2	4.3061	0.4515	1699.7	1	0.833333
					R.GWDAQVLGEAPHK.F	1408.54	2	3.2632	0.4604	1138.8	1	0.75
					K.ALEIGEK.A	759.871	1	1.4909	0.1863	430.7	2	0.75
					K.ALEIGEK.A	759.871	1	1.8831	0.2159	516.3	1	0.75
					R.VHILTDGR.D	911.041	2	1.9366	0.2993	810.2	1	0.714286
					K.ALEYEDFDKFDR.V	1548.64	2	1.8215	0.346	586.6	1	0.545455
					R.VHILTDGR.D	911.041	2	2.1306	0.4109	1030.4	1	0.857143
					R.YLVSPPEIDR.T	1189.34	2	1.4637	0.1011	324	8	0.444444
					R.GWDAQVLGEAPHK.F	1408.54	2	1.2522	0.1626	306.1	4	0.416667
					R.LDQLQLLIK.G	1084.33	2	3.485	0.229	1532.3	1	0.875
					R.LDQLQLLIK.G	1084.33	2	2.7597	0.1737	986.2	1	0.8125
XR7	At1g09780	XP_006417539	2,3-bisphosphoglycerate-independent phosphoglycerate mutase 1	6	K.NAVEAVK.T	730.833	1	1.466	0.1254	423.9	2	0.75
					R.DAILSGK.F	703.808	1	1.5411	0.2662	430.9	1	0.666667
					R.DAILSGK.F	703.808	1	1.4181	0.3459	456.4	1	0.666667
					R.GWDAQVLGEAPHK.F	1408.54	2	3.6268	0.4642	1456.5	1	0.75
					R.SGYFNEK.L	844.892	1	1.2438	0.1762	182.6	8	0.5
					R.VHILTDGR.D	911.041	2	2.2335	0.4216	727.1	1	0.714286
XR5	At5g08570	XP_006399365	pyruvate kinase	6	K.DGNPIQLK.E	885.001	1	1.7335	0.1232	576.8	1	0.714286
					K.DGNPIQLK.E	885.001	2	2.5161	0.3014	575.5	2	0.928571
					K.DGNPIQLK.E	885.001	1	1.4245	0.1984	291	3	0.571429
					R.KGSDLVNVR.K	988.124	2	2.166	0.2024	1083.6	1	0.875
					K.LIIVLTR.G	828.078	1	1.3937	0.1999	318.5	2	0.666667
					K.LIIVLTR.G	828.078	1	1.4206	0.163	217.9	3	0.583333
SR16	At5g50850	XP_006399365	pyruvate dehydrogenase E1 component subunit beta-1	4	R.ATINASVR.K	831.941	2	1.5035	0.3425	786.1	1	0.857143
					R.ATINASVR.K	831.941	2	1.7237	0.1173	896	1	0.785714
					R.SIRPLDR.A	856.994	2	1.4096	0.2544	216	105	0.583333
					K.LAEEGISAEVINLR.S	1514.71	2	2.7603	0.3966	1326.8	1	0.730769
XR9	At5g50850	XP_006402055	pyruvate dehydrogenase E1 component subunit beta-1	5	R.SIRPLDR.A	856.994	2	1.5658	0.1095	194.5	51	0.5
					R.ATINASVR.K	831.941	2	1.4777	0.2382	545.7	1	0.714286
					R.ATINASVR.K	831.941	2	1.7818	0.3181	730.9	1	0.785714
					K.LAEEGISAEVINLR.S	1514.71	2	3.5752	0.3871	1229.3	1	0.730769
					K.LAEEGISAEVINLR.S	1514.71	2	4.1615	0.3476	1597.5	1	0.769231
SR4	At2g45290	XP_024010889	transketolase-2	4	K.VTTTIGYGSPNK.A	1238.37	2	1.7714	0.3571	266.5	3	0.409091
					R.FLAIDAVEK.A	1006.18	2	1.675	0.0982	479.9	3	0.75
					K.NPYWFNR.D	997.091	2	1.8641	0.4367	483.8	1	0.75
					K.NPYWFNR.D	997.091	2	1.6169	0.3009	255.6	3	0.583333
Oxidation-reduction process
XR1	At5g37510	XP_006405867	NADH dehydrogenase [ubiquinone] iron-sulfur protein 1	6	K.HLGTGPDTLK.E	1039.17	2	3.041	0.4355	520.9	1	0.777778
					K.HLGTGPDTLK.E	1039.17	2	2.3472	0.3851	351.4	3	0.666667
					K.DAFVVYQGHHGDK.A	1473.57	3	1.7985	0.1801	247.6	4	0.3125
					K.HLGTGPDTLK.E	1039.17	2	1.7941	0.1482	291.7	2	0.611111
					R.GSGEEIGTYVEK.L	1269.34	2	1.4237	0.3592	282.2	6	0.409091
					K.NLGPLVK.T	740.915	1	1.2222	0.1221	208.9	3	0.666667
XR13	At5g54500	XP_006401566	NAD(P)H dehydrogenase (quinone) FQR1	11	K.GAASVEGVEAK.L	1018.1	2	2.6616	0.4964	1197	1	0.8
					K.GAASVEGVEAK.L	1018.1	2	3.0991	0.3636	1446.5	1	0.85
					K.GAASVEGVEAK.L	1018.1	2	2.9248	0.5229	1223.9	1	0.8
					K.LAEEIRK.G	859.006	2	1.7266	0.1116	618.5	1	0.916667
					R.KGAASVEGVEAK.L	1146.28	2	3.3819	0.4191	1286.2	1	0.863636
					R.KGAASVEGVEAK.L	1146.28	2	4.0972	0.5353	1246.1	1	0.818182
					R.KGAASVEGVEAK.L	1146.28	3	1.7538	0.1433	603.6	2	0.409091
					R.KGAASVEGVEAK.L	1146.28	3	2.2371	0.2254	674.8	3	0.454545
					K.LAEEIRK.G	859.006	2	1.526	0.109	502.7	3	0.833333
					R.KGAASVEGVEAK.L	1146.28	2	2.0745	0.3352	636.6	1	0.590909
					R.KGAASVEGVEAK.L	1146.28	2	2.4607	0.4796	765.9	1	0.727273
SR8	At5g03630	XP_024011589	monodehydroascorbate reductase 2	12	K.TLVSGTGQVFK.Y	1137.31	2	2.9666	0.5719	1029.4	1	0.85
					K.ADLAAKTLVSGTGQVFK.Y	1706.97	3	1.489	0.1707	241.1	3	0.265625
					K.TLVSGTGQVFK.Y	1137.31	2	2.7793	0.4796	959.9	1	0.8
					R.EQVPPYERPALSK.G	1514.71	2	1.9513	0.466	398.9	1	0.625
					K.ADLAAKTLVSGTGQVFK.Y	1706.97	3	1.9054	0.1294	214.5	5	0.265625
					K.TLVSGTGQVFK.Y	1137.31	2	2.9225	0.5012	1014.8	1	0.85
					K.TLVSGTGQVFK.Y	1137.31	2	2.4033	0.4473	597.4	1	0.7
					R.PIISLFK.D	818.039	1	1.7326	0.1918	497.6	2	0.666667
					R.PIISLFK.D	818.039	2	1.9694	0.1933	337.8	1	0.833333
					R.PIISLFK.D	818.039	2	2.586	0.2134	295.2	1	0.75
					R.PIISLFK.D	818.039	1	1.525	0.2819	503	1	0.75
					R.PIISLFK.D	818.039	2	1.3	0.1676	242.4	1	0.666667
XR8	At5g03630	XP_024011589	monodehydroascorbate reductase 2	9	R.RVEHVDHAR.K	1119.22	3	2.7336	0.3842	480.1	3	0.4375
					K.TLVSGTGQVFK.Y	1137.31	2	2.6219	0.5067	1063.1	1	0.8
					K.ADLAAKTLVSGTGQVFK.Y	1706.97	3	1.8701	0.2206	260.1	1	0.28125
					K.TLVSGTGQVFK.Y	1137.31	2	2.9425	0.478	780.2	1	0.75
					K.GINIVK.G	643.799	1	1.3865	0.1029	355.6	2	0.7
					K.TLVSGTGQVFK.Y	1137.31	2	1.946	0.3385	838.1	1	0.75
					R.PIISLFK.D	818.039	2	1.9599	0.3086	352.3	1	0.833333
					R.PIISLFK.D	818.039	2	1.752	0.2301	403.7	1	0.833333
					R.PIISLFK.D	818.039	1	1.76	0.2663	433.6	4	0.666667
XR6	At2g14170	XP_006409665	methylmalonate-semialdehyde dehydrogenase	7	R.LIQSGVDDGAK.L	1103.21	2	2.5764	0.3422	979	1	0.75
					R.LIQSGVDDGAK.L	1103.21	2	2.6267	0.2743	1082.3	1	0.7
					K.ASFAGDLNFYGK.A	1290.41	2	1.732	0.1744	590.1	1	0.590909
					K.FQELIR.K	805.945	2	1.318	0.1039	349.5	8	0.9
					K.FQELIR.K	805.945	1	1.3652	0.1219	297.1	14	0.7
					K.AGVDFFTQIK.T	1126.29	2	2.9603	0.1644	1330.5	1	0.833333
					K.AGVDFFTQIK.T	1126.29	2	3.1326	0.1805	1210.6	1	0.833333
Response to abiotic stimulus
SR9	At1g77120	XP_006409665	alcohol dehydrogenase class-P	12	K.GTFFGNYKPK.T	1159.32	2	2.2531	0.3637	578.5	1	0.722222
					K.GQTPLFPR.I	916.06	2	1.2025	0.2803	149.7	2	0.642857
					K.GQTPLFPR.I	916.06	2	1.3491	0.1957	98.9	17	0.428571
					K.GTFFGNYKPK.T	1159.32	2	1.4493	0.2928	421.8	1	0.611111
					K.GTFFGNYKPK.T	1159.32	2	2.2941	0.4325	533.1	1	0.722222
					K.GTFFGNYKPK.T	1159.32	2	2.3464	0.3059	566.4	1	0.722222
					K.GQTPLFPR.I	916.06	2	1.723	0.1973	314.6	1	0.785714
					K.GTFFGNYKPK.T	1159.32	2	2.264	0.1764	635.9	1	0.722222
					K.GTFFGNYKPK.T	1159.32	2	2.1075	0.3918	592.9	1	0.666667
					K.GQTPLFPR.I	916.06	2	1.5606	0.1912	305.9	1	0.714286
					K.GTFFGNYKPK.T	1159.32	2	1.85	0.4449	342	1	0.5
					K.GTFFGNYKPK.T	1159.32	2	1.4648	0.3854	343.4	2	0.555556
SR10	At2g30870	XP_006410185	glutathione S-transferase F10	5	K.IPVLVDGDYK.I	1119.29	2	1.3295	0.1646	963.5	1	0.722222
					K.IPVLVDGDYK.I	1119.29	2	2.2768	0.3316	1511.4	1	0.888889
					K.IPVLVDGDYK.I	1119.29	1	1.8231	0.2535	835.8	1	0.722222
					K.IPVLVDGDYK.I	1119.29	2	2.2136	0.3274	1326.4	1	0.833333
					K.HVSAWWDK.I	1029.13	2	1.2906	0.1328	538.7	1	0.785714
XR10	At2g30870	XP_006410185	glutathione S-transferase F10	15	K.IPVLVDGDYK.I	1119.29	2	2.4963	0.3691	1157.2	1	0.888889
					K.IPVLVDGDYK.I	1119.29	2	2.6018	0.267	1492.9	1	0.888889
					K.IPVLVDGDYK.I	1119.29	1	1.715	0.2689	917.9	1	0.722222
					K.IPVLVDGDYK.I	1119.29	1	1.284	0.2165	520.5	1	0.611111
					K.IPVLVDGDYK.I	1119.29	2	2.7179	0.4448	1502.6	1	0.888889
					K.IPVLVDGDYK.I	1119.29	1	1.3304	0.2011	790.4	1	0.722222
					K.IPVLVDGDYK.I	1119.29	2	2.2417	0.3975	1411.2	1	0.833333
					K.IPVLVDGDYK.I	1119.29	2	2.0728	0.3309	1373.4	1	0.888889
					K.IPVLVDGDYK.I	1119.29	2	2.4756	0.329	1187.2	1	0.833333
					K.IPVLVDGDYK.I	1119.29	2	2.153	0.2931	920.9	1	0.777778
					K.IPVLVDGDYK.I	1119.29	2	2.1174	0.433	1035.5	1	0.833333
					K.IPVLVDGDYK.I	1119.29	2	2.6189	0.4717	1113.3	1	0.833333
					K.IPVLVDGDYK.I	1119.29	2	2.3108	0.3253	1519.3	1	0.888889
					K.IPVLVDGDYK.I	1119.29	2	1.9602	0.3708	1332.6	1	0.833333
					K.IPVLVDGDYK.I	1119.29	2	1.9101	0.369	1003.6	1	0.833333
SR11	At5g20720	XP_024011493	20 kDa chaperonin	26	K.YAGNDFK.G	814.866	1	1.3013	0.1827	200.6	11	0.5
					K.YAGNDFK.G	814.866	2	1.7113	0.2933	512.5	1	0.833333
					K.PQGGEVVAVGEGR.T	1255.36	2	2.5003	0.5338	1193.5	1	0.708333
					K.PQGGEVVAVGEGR.T	1255.36	2	3.2283	0.6915	1511	1	0.75
					K.DGSNYIALR.A	1009.1	2	2.6489	0.2907	1306.4	1	0.9375
					K.DGSNYIALR.A	1009.1	2	2.8753	0.2377	1174.6	1	0.875
					K.YAGTEVEFNDVK.H	1372.46	2	3.4709	0.5543	1798.5	1	0.863636
					K.YAGTEVEFNDVK.H	1372.46	2	3.0325	0.5482	1460.6	1	0.772727
					K.TAGGLLLTETTK.E	1205.38	2	2.3014	0.4323	503.3	1	0.590909
					K.HLILK.E	623.811	2	1.5681	0.1441	463.4	8	0.875
					K.DGSNYIALR.A	1009.1	2	2.7479	0.3471	989.1	1	0.875
					K.DGSNYIALR.A	1009.1	2	2.4755	0.3326	915.8	1	0.8125
					K.IDITVPTGAQIIYSK.Y	1619.88	2	1.7307	0.3294	151.2	1	0.428571
					K.YAGTEVEFNDVK.H	1372.46	2	2.1568	0.5235	1217.7	1	0.727273
					K.EKPSIGTVIAVGPGSLDEEGK.I	2084.31	3	1.9868	0.2383	436.4	1	0.2375
					K.EKPSIGTVIAVGPGSLDEEGK.I	2084.31	3	1.6948	0.197	463.9	1	0.275
					K.YAGTEVEFNDVK.H	1372.46	2	2.8862	0.4757	1877.4	1	0.818182
					K.DLKPLNDR.V	971.093	2	2.0981	0.2103	178.4	7	0.642857
					K.TAGGLLLTETTK.E	1205.38	2	2.2767	0.5192	763.3	1	0.681818
					K.TAGGLLLTETTK.E	1205.38	2	2.2172	0.4665	1029.6	1	0.681818
					K.TAGGLLLTETTK.E	1205.38	2	2.479	0.4427	1220.2	1	0.818182
					K.TAGGLLLTETTK.E	1205.38	2	2.0328	0.2615	504.1	3	0.545455
					K.TAGGLLLTETTK.E	1205.38	2	2.0875	0.3065	844.6	1	0.636364
					K.TAGGLLLTETTK.E	1205.38	2	2.6137	0.5021	477.6	1	0.545455
					K.DLKPLNDR.V	971.093	2	1.2034	0.2136	182.8	29	0.642857
					K.YAGTEVEFNDVK.H	1372.46	2	1.8872	0.3331	939.5	1	0.636364
XR11	At5g20720	XP_024011493	20 kDa chaperonin	21	K.IKEAEEK.T	846.949	2	2.009	0.0978	390.5	11	0.75
					K.YAGNDFK.G	814.866	1	1.6349	0.2791	611.9	1	0.75
					K.EKPSIGTVIAVGPGSLDEEGK.I	2084.31	3	3.0942	0.434	639.1	1	0.325
					K.YAGNDFK.G	814.866	2	1.8836	0.3349	378.1	1	0.75
					K.EKPSIGTVIAVGPGSLDEEGK.I	2084.31	3	2.2578	0.2074	727.4	1	0.325
					K.DLKPLNDR.V	971.093	2	1.2495	0.1601	175.5	7	0.642857
					K.DLKPLNDR.V	971.093	2	1.45	0.2377	191	5	0.642857
					K.PQGGEVVAVGEGR.T	1255.36	2	2.377	0.5252	436.5	1	0.5
					K.DGSNYIALR.A	1009.1	2	2.5696	0.2548	1120.4	1	0.8125
					K.DGSNYIALR.A	1009.1	2	2.2927	0.266	926.2	1	0.8125
					K.GKDGSNYIALR.A	1194.32	2	2.2049	0.363	695.5	1	0.75
					K.TAGGLLLTETTK.E	1205.38	2	1.7573	0.126	369	3	0.454545
					K.TAGGLLLTETTK.E	1205.38	2	2.7153	0.4344	751.4	1	0.681818
					K.DGSNYIALR.A	1009.1	2	2.1383	0.2942	1000.4	1	0.875
					K.YAGTEVEFNDVK.H	1372.46	2	2.9286	0.3711	2006.6	1	0.863636
					K.YAGTEVEFNDVK.H	1372.46	2	2.1127	0.4644	1127.9	1	0.772727
					K.TAGGLLLTETTK.E	1205.38	2	1.8851	0.3649	365.5	1	0.5
					K.YAGTEVEFNDVK.H	1372.46	2	1.2065	0.2723	474	1	0.5
					K.YAGTEVEFNDVK.H	1372.46	2	1.3353	0.1523	644.7	1	0.636364
					K.YAGTEVEFNDVK.H	1372.46	2	2.1041	0.3628	862.8	1	0.681818
					K.DGSNYIALR.A	1009.1	2	1.4977	0.1778	955.1	1	0.8125
SR15	At1g66700	XP_006391421	paraxanthine methyltransferase 1	6	R.KAFELVEVK.A	1063.27	2	2.4848	0.2069	860.5	1	0.8125
					R.KAFELVEVK.A	1063.27	2	2.8277	0.2537	873.8	1	0.875
					K.AFELVEVK.A	935.1	1	1.5872	0.2056	418.5	5	0.642857
					K.AFELVEVK.A	935.1	1	1.3955	0.1269	393	4	0.642857
					K.AFELVEVK.A	935.1	1	1.9684	0.2501	624.7	1	0.714286
					K.AFELVEVK.A	935.1	1	1.9505	0.2477	478.2	1	0.714286
SR1	At3g16460	XP_006406833	jacalin-related lectin 34	5	K.FTLQVQDK.K	979.112	2	2.3231	0.3362	658.2	1	0.928571
					K.FTLQVQDK.K	979.112	2	2.5288	0.2291	881.9	1	1
					K.SGFQISAPEATGK.Q	1293.41	2	3.3292	0.368	759.9	1	0.75
					K.FTLQVQDK.K	979.112	2	1.9366	0.3471	365.8	1	0.642857
					K.SGFQISAPEATGK.Q	1293.41	2	1.8899	0.2833	372.7	2	0.458333
SR2	At3g16460	XP_006406833	jacalin-related lectin 34	14	K.FTLQVQDK.K	979.112	2	2.8651	0.3402	828.3	1	1
					K.SGFQISAPEATGK.Q	1293.41	2	3.0775	0.4224	566.7	1	0.625
					K.FTLQVQDK.K	979.112	1	2.1378	0.2697	791	1	0.714286
					K.SGFQISAPEATGK.Q	1293.41	1	1.3716	0.161	537.9	1	0.541667
					K.FTLQVQDKK.I	1107.29	2	2.7726	0.2638	863.8	1	0.8125
					K.SGFQISAPEATGK.Q	1293.41	2	2.4849	0.3904	591.9	1	0.625
					K.SGFQISAPEATGK.Q	1293.41	2	2.9388	0.3462	613.2	1	0.666667
					K.FTLQVQDKK.I	1107.29	2	2.8057	0.3606	1006.9	1	0.875
					K.FTLQVQDK.K	979.112	1	1.4569	0.1173	594.9	5	0.642857
					K.FTLQVQDK.K	979.112	1	2.2658	0.2786	629.8	3	0.642857
					K.FTLQVQDK.K	979.112	2	2.0276	0.2859	547	2	0.785714
					K.SLSTQEVITALTFTTNK.T	1855.08	2	2.0229	0.3129	401.8	1	0.375
					K.SLSTQEVITALTFTTNK.T	1855.08	2	2.6834	0.3955	418.4	1	0.40625
					K.FTLQVQDK.K	979.112	2	1.5403	0.2658	612.1	1	0.785714
SR3	At3g16460	XP_006406833	jacalin-related lectin 34	4	K.FTLQVQDK.K	979.112	2	2.5284	0.3038	777.1	1	0.928571
					K.SGFQISAPEATGK.Q	1293.41	2	2.9341	0.4158	1247.4	1	0.75
					K.FTLQVQDK.K	979.112	2	2.1404	0.3108	791	1	1
					K.SLSTQEVITALTFTTNK.T	1855.08	2	2.2316	0.3448	700.5	1	0.5
XR4	At3g16460	XP_006406833	jacalin-related lectin 34	23	K.SGFQISAPEATGK.Q	1293.41	2	3.2139	0.3697	845.6	1	0.75
					K.FTLQVQDK.K	979.112	1	1.7162	0.2578	606	2	0.642857
					K.FTLQVQDK.K	979.112	1	2.0896	0.2125	622.2	2	0.714286
					K.SGFQISAPEATGK.Q	1293.41	1	1.8327	0.2993	497.3	1	0.583333
					K.FTLQVQDKK.I	1107.29	2	2.8631	0.3309	1060.5	1	0.875
					K.FTLQVQDKK.I	1107.29	2	2.4185	0.2638	666.6	1	0.8125
					K.FTLQVQDK.K	979.112	2	2.2326	0.3263	404.9	1	0.714286
					K.SGFQISAPEATGK.Q	1293.41	2	2.1111	0.4501	605.9	1	0.666667
					K.FTLQVQDK.K	979.112	2	2.1395	0.3713	655.6	1	0.857143
					K.SGFQISAPEATGK.Q	1293.41	2	2.2564	0.3383	1222.1	1	0.75
					K.FTLQVQDK.K	979.112	1	1.8235	0.2729	682	2	0.714286
					K.SLSTQEVITALTFTTNK.T	1855.08	2	2.5968	0.446	403.9	1	0.40625
					K.SGFQISAPEATGK.Q	1293.41	2	1.8061	0.3329	563	1	0.583333
					K.SGFQISAPEATGK.Q	1293.41	2	2.0375	0.3114	503.5	1	0.541667
					K.SGFQISAPEATGK.Q	1293.41	2	1.7065	0.2757	458.6	1	0.5
					K.SGFQISAPEATGK.Q	1293.41	2	2.2547	0.2806	574.3	1	0.541667
					K.SGFQISAPEATGK.Q	1293.41	2	2.1505	0.2412	740	1	0.625
					K.FTLQVQDK.K	979.112	2	2.1008	0.2795	450.5	6	0.785714
					K.SGFQISAPEATGK.Q	1293.41	2	2.3308	0.3127	629.6	1	0.625
					K.SGFQISAPEATGK.Q	1293.41	2	2.6335	0.357	617.9	1	0.625
					K.FTLQVQDK.K	979.112	2	2.0669	0.3728	408.5	2	0.714286
					K.FTLQVQDKK.I	1107.29	2	1.8927	0.1521	293.9	10	0.5625
					K.FTLQVQDKK.I	1107.29	2	1.5182	0.1759	485.4	2	0.5625
Unknown
SR18	At1g48090	XP_006393484	uncharacterized LOC18010485	4	K.DLDSKVILLWR.L	1358.61	2	1.7933	0.1673	456.5	10	0.5
					K.DLDSKVILLWR.L	1358.61	2	1.2178	0.1583	447.3	11	0.55
					R.VTILK.E	573.749	1	1.2837	0.1137	181.8	2	0.625
					K.DEWKAINKLLSHQPDEEMNLYSGK.D	2847.15	3	1.5212	0.287	87.4	24	0.184783
XR14	At1g28680	XP_006415631	spermidine sinapoyl-CoA acyltransferase	3	K.VLVNLR.E	713.892	1	1.5633	0.1371	243.2	2	0.8
					R.SFIDFQELHHK.D	1401.55	3	1.2709	0.2137	80.9	94	0.275
					R.SFIDFQELHHK.D	1401.55	2	3.4787	0.3972	1139.8	1	0.75
XR16	At5g43060	XP_006403303	probable cysteine protease RD21B	13	K.ALAHQPISVAIEAGGR.A	1590.81	2	3.1409	0.5217	595.5	1	0.633333
					K.ALAHQPISVAIEAGGR.A	1590.81	3	1.8807	0.3273	303.1	20	0.25
					K.ALAHQPISVAIEAGGR.A	1590.81	2	3.2398	0.526	458.6	1	0.6
					K.ALAHQPISVAIEAGGR.A	1590.81	3	2.908	0.2547	907.2	2	0.383333
					R.NIEAPTGK.C	829.922	1	1.5186	0.2085	240.3	2	0.571429
					K.ALAHQPISVAIEAGGR.A	1590.81	2	1.4676	0.3393	202.5	2	0.4
					K.ALAHQPISVAIEAGGR.A	1590.81	2	2.5554	0.4308	457.9	1	0.533333
					K.KALAHQPISVAIEAGGR.A	1718.98	3	1.2676	0.206	353	4	0.265625
					K.ALAHQPISVAIEAGGR.A	1590.81	2	2.1024	0.4707	364.4	1	0.5
					K.ALAHQPISVAIEAGGR.A	1590.81	2	2.6875	0.5287	253.1	1	0.466667
					K.ALAHQPISVAIEAGGR.A	1590.81	2	2.7541	0.5116	656.7	1	0.633333
					K.ALAHQPISVAIEAGGR.A	1590.81	2	1.8232	0.3071	231.3	1	0.433333
					K.ALAHQPISVAIEAGGR.A	1590.81	2	2.5359	0.5236	348.6	1	0.5
