# Supplementary material for: Dissecting the Molecular Regulation of Natural Variation in Growth and Senescence of Two Eutrema salsugineum Ecotypes
Source: Int J Mol Sci. 2022 May 30;23(11):6124. doi: 10.3390/ijms23116124 (PMC9181637; doi:10.3390/ijms23116124)
Supplement: Supplementary file 1 [file ijms-23-06124-s001.zip › Supplementary Table S3.xls]

## Sheet: Sheet1
Table S3. Primers for qRT-PCR analysis.
Gene name	Primer Sequence （5'-3'）
	Forward	Reverse
plasma membrane-associated cation-binding protein 1	CTGGAATTCGAAGGTTGTTCC	CTGGAATTCGAAGGTTGTTCC
pathogenesis-related protein 5	GCGAATTTCTCCAGTGTTCAGAT	GAGGAGTCGAAGTTGCAGCC
endochitinase CHI	TCTTCCATCTCCAAACGCGAAA	TGCCACAGGGACCATAGTT
probable glucan endo-1,3-beta-glucosidase BG1	GATCTCCGTTTCTTGGCGTC	GCCTAACTCGCCGGATGTT
ketol-acid reductoisomerase, chloroplastic	GCGGTCAGAACCCCTGTTTC	CCTGAGATCCCCAGCCAATC
1-aminocyclopropane-1-carboxylate oxidase 4	CTCGACTCTGTTCGGTCTGA	TTAGCTCCGGTTGAGGACAAG
LL-diaminopimelate aminotransferase	GCTCGAAATGGTTGCTTACCC	GTGCAGACCTTCTCCTTGCG
glutathione synthetase	CGTTTGGTCTTCCCTTCACG	CGTTTGGTCTTCCCTTCACG
monodehydroascorbate reductase 2	GTCTGAAACCTGGTGAACTTGC	CTCTGTGTCCAGAATCAGCTC
alcohol dehydrogenase class-P	CGGAAAGCCACTGGTGATGG	CAGTGACGGCAATCTCCACA
glutathione S-transferase F10	CGCTTGTGACGCTAGTTGAGA	TCGTCTTCCCCAACAAGTCTG
20 kDa chaperonin	CCTCGTTGGAAGGTCTCCG	CACCGACAGCAACGACTTCA
paraxanthine methyltransferase 1	AGAGTTACAATCAGCATTCCTCGT	AGTGTTGAAATCGTTGGTGGT
pyruvate dehydrogenase E1 component subunit beta-1	CGTCGATGGAGGCTTTTCTG	GCCAACCTCTTCACCCATGAC
NADH dehydrogenase [ubiquinone] iron-sulfur protein 1	TTGAGGTCGAGAAATCCCCC	ATCTCAGTGAAACGGCCTCTG
methylmalonate-semialdehyde dehydrogenase [acylating]	CTCGGTATTAGAAGCTGTTGGT	TGCCGCCTTAAACTCTTCGT
NAD(P)H dehydrogenase (quinone) FQR1	GGTCATGTGGAGAAATTGGCTG	AGCAGCCATCATACCAAACCT
actin-2	ATCTATCCTTGCATCCCTCAGCAC	GGTAACAAACTCACCACCACGAAC
